# Supplementary material for: Crown ether-based interface modification for inverted perovskite solar cells with enhanced efficiency and stability
Source: Royal Society of Chemistry journal article supplement (doi:10.1039/d5cc05917h), 2025-11-25
Supplement: d5cc05917h1.pdf [file d5cc05917h1.pdf]

**Supplementary Information**  
*of*  
**Crown ether-based interface modification for inverted  
perovskite solar cells with enhanced efficiency and  
stability**

Yang Zhang<sup>a</sup>, Ting Jiang<sup>a</sup>, Jingquan Zhang<sup>a,b</sup>, Lili Wu<sup>a,b</sup>, Guanggen Zeng<sup>a,b</sup>,  
Baoyan Fan<sup>c</sup>, Komiljon Yakubov<sup>d</sup>, Tulkin Nurmurodov<sup>e</sup>, Ilyos Rakhmatullaev<sup>f</sup>, Xia  
Hao<sup>a,b,\*</sup>

<sup>a</sup> *Institute of New Energy and Low-Carbon Technology & College of Materials Science  
and Engineering, Sichuan University, Chengdu 610065, China*

<sup>b</sup> *Engineering Research Center of Alternative Energy Materials & Devices, Ministry of  
Education, Chengdu 610065, China*

<sup>c</sup> *College of Materials and New Energy, Chongqing University of Science and  
Technology, Chongqing 401331, China*

<sup>d</sup> *Department of Physics, Urgench State University, Urgench 220100, Uzbekistan*

<sup>e</sup> *Department of Chemical Technology, Navoi State University of Mining and  
Technologies, Navoi 210100, Uzbekistan*

<sup>f</sup> *Department of Mathematics and Physics, Alfraganus University, Tashkent 100190,  
Uzbekistan*

*\*Correspondence Information: hao.xia0808@scu.edu.cn (X. Hao)*

## Experimental section

### Materials and solutions

*N,N*-dimethylformamide (DMF, 99.8%), dimethyl sulfoxide (DMSO,  $\geq 99.9\%$ ), chlorobenzene (CB,  $\geq 99.8\%$ ), isopropanol (IPA,  $\geq 99.5\%$ ), Dibenzo-18-crown-6 (DB18C6, 98%), and anhydrous ethanol were purchased from Sigma Aldrich. Lead (II) iodide ( $\text{PbI}_2$ , 99.99%). Cesium iodide (CsI,  $>99.9\%$ ), and [4-(3,6-Dimethyl-9*H*-carbazol-9-yl)butyl]phosphonic acid (Me-4PACz,  $>99\%$ ) were purchased from Tokyo Chemical Industry (TCI). Formamidinium iodide (FAI,  $>99.99\%$ ), methylammonium bromide (MABr,  $>99.99\%$ ), and methylammonium chloride (MACl,  $>99\%$ ) were purchased from Greatcell Solar Materials Pty. Ltd. Lead bromide ( $\text{PbBr}_2$ ,  $>99.99\%$ ), bathocuproine (BCP, 99.5%), and [6,6]-Phenyl  $\text{C}_{60}$  butyric acid methyl ester (PCBM, 99.0%) were purchased from Xi'an Polymer Light Technology Corp.  $\text{NiO}_x$  (99.99%) powders and Spiro-OMeTAD (99.9%) were purchased from Advanced Selection Technology Co., Ltd. Silver was purchased from (Zhong Nuo Advanced Material Beijing) Technology Co., Ltd. ITO glass substrates (2.5 cm $\times$ 2.5 cm) were purchased from Shangyang Technology.

$\text{NiO}_x$  was dissolved in deionized water (20 mg/mL). Me-4PACz was dissolved in ethanol (0.5 mg/mL). To prepare perovskite solution, 41.73 mg CsI, 15.55 mg MABr, 55.3 mg  $\text{PbBr}_2$ , 450.8 mg FAI, 1317 mg  $\text{PbI}_2$  and 20.34 mg MACl were mixed in 1 mL mixed solvent (DMF:DMSO=4:1) according to a formula of

$\text{Cs}_{0.04}(\text{FA}_{0.84}\text{MA}_{0.16})_{0.96}\text{Pb}(\text{I}_{0.84}\text{Br}_{0.16})_3$ . DB18C6 was dissolved in CB (0.5 mg/mL).

PCBM was dissolved in CB (15 mg/mL). BCP was dissolved in IPA (0.5 mg/mL).

### **Device fabrication**

The ITO glass substrate was ultrasonically cleaned with water and anhydrous ethanol for 40 min. Then, the cleaned substrate was blown dry by high purity nitrogen, followed treated for 15 min by ultraviolet-ozone (UVO). After that, 120  $\mu\text{L}$   $\text{NiO}_x$  solution was spin-coting for 30 s at 2000 rpm and annealing at 150  $^{\circ}\text{C}$  for 30 min. After cooling to room temperature, transfer the substrate into nitrogen-filled glove-box. The 100  $\mu\text{L}$  Me-4PACz solution was deposited on  $\text{NiO}_x$  layer by spin-coating at 3000 rpm for 30 s and annealing at 100  $^{\circ}\text{C}$  for 10 min. Then, perovskite film was obtained by spin-coating 1000 rpm for 10 s and 5000 rpm for 40 s and drip 200  $\mu\text{L}$  CB at the 45 s, followed by annealing at 100  $^{\circ}\text{C}$  for 30 min. For target, the perovskite film was treated with 80  $\mu\text{L}$  of DB18C6 solution via spin-coating (4000 rpm, 20 s) prior to being annealed at 100  $^{\circ}\text{C}$  for 5 minutes. Afterwards, 85  $\mu\text{L}$  PCBM solution and 105  $\mu\text{L}$  BCP solution were sequentially deposited at 2000 rpm for 30 s and 4000 rpm for 30 s, respectively. Finally, a 120 nm thick film of Ag was evaporated onto the BCP layer.

### **Characterization**

The ultraviolet-visible (UV-Vis) absorption spectra were measured by using Ultraviolet-visible spectrophotometer (Lambda 950) produced by PerkinElmer, Inc. The X-ray diffraction (XRD) patterns were obtained by X-Ray diffractometer (XRD-6100) produced by Shimazu. The scanning electron microscopy (SEM) images were

measured by field emission scanning electron microscope (Hitachi Regulus8100) produced by Hitachi, Japan. The atomic force microscopy (AFM) images were obtained to using atomic force microscope (DI Multimode 8) produced by Bruker Nano Inc, Germany. The X-ray photoelectron spectroscopy (XPS) patterns were conducted by X-ray photoelectron spectroscopy (ESCALAB 250Xi) produced by ThermoFisher. The fourier transform infrared spectroscopy (FTIR) tests were conducted by infrared spectrometer (Nicolet iS50) produced by ThermoFisher. The Stead-state photoluminescence (PL) and time-resolved photoluminescence (TRPL) were conducted by FLS980 produced by Edinburgh. The kelvin probe force microscopy (KPFM) images of perovskite films were measured using Multimode 8 high-resolution scanning probe microscope produced by Bruker. The UV photoelectron spectroscopy (UPS) measurements were conducted through identical equipment with XPS test to obtain the work function and valance band of perovskite films.

The  $J-V$  curves were measured using a source meter (Keysight Technologies, B2901A) and Sun 200 steady-state solar simulator produced by ABET Technology under simulated sunlight (AM 1.5G, 100 mW/cm<sup>2</sup>) calibrated by a standard silicon solar cell (Enli Tech, RC-00205). The external quantum efficiency (EQE) tests were conducted through QE-R Guangyan technology quantum efficiency test system (QE-R3018) produced by Enlitech, calibrated by a standard silicon solar cell. The dark  $J-V$  and space charge limited current (SCLC) tests were carried out using a Keysight 2400 source meter under dark condition. The light intensity dependence of  $V_{oc}$

measurements were conducted by  $J$ - $V$  test under different intensity of illumination. The capacitance-voltage ( $C$ - $V$ ) tests were measured by an electrochemical workstation fabricated by LVIUM. The maximum power point tracking (MPPT) was recorded by white LED simulator (Weina Bonuo new materials Co., Ltd., Qingdao) equivalent to 1 sun ( $100 \text{ mW cm}^{-2}$ ) in ambient air.

**Note S1. Calculation of crystallite sizes**

The mean crystallite sizes ( $D$ ) of the most intense diffraction peak (i.e., (001) facet) of the perovskite are calculated by the Scherrer equation:

$$D = \frac{K\lambda}{FWHM\cos\theta} \quad (1)$$

where  $K$  is the Scherrer constant,  $\lambda$  is the wavelength of the x-ray used and  $\theta$  is the Bragg angle.

## Note S2. TRPL characterizations analysis

TRPL is used to investigate the recombination and molecular dynamics of electrons.

A double-exponential function is used to fit the curve:

$$y(t) = y_0 + A_1 \exp\left(-\frac{t}{\tau_1}\right) + A_2 \exp\left(-\frac{t}{\tau_2}\right) \quad (2)$$

where  $\tau$  is decay component,  $A_1$  and  $A_2$  are decay amplitudes. The average lifetime of the nonradiative recombination process can be calculated according to the following formula:

$$\tau_{ave} = \frac{\sum A_i \tau_i^2}{\sum A_i \tau_i} \quad (3)$$

The corresponding fitted parameters are shown in **Table S2**.

### Note S3. SCLC analysis

SCLC spectra measurement is performed based on the structure of ITO/NiO<sub>x</sub>/Me-4PACz/Perovskite/Spiro-OMeTAD/Au to determine the trap density ( $n_t$ ). The  $n_t$  is calculated using the following equations:

$$n_t = \frac{2V_{TFL}\epsilon_r\epsilon_0}{eL^2} \quad (4)$$

where  $e$  is the elementary charge,  $V_{TFL}$  is the trap-filled limit voltage,  $L$  is the thickness of the perovskite film,  $\epsilon_0$  is the vacuum permittivity and  $\epsilon_r$  is the relative dielectric constant of perovskite.



#### **Note S4. Calculation of hysteresis index**

The hysteresis index (HI) is defined by the formula:

$$HI = \frac{|PCE_{reverse} - PCE_{forward}|}{PCE_{reverse}} \times 100\% \quad (5)$$

where  $PCE_{reverse}$  is PCE in the condition of reverse scans in  $J-V$  test and  $PCE_{forward}$  is PCE in the condition of forward scans in  $J-V$  test.

**Note S5. Calculation of ideal factor**

The ideal factor ( $n_{id}$ ) can be obtained from intensity-dependent  $V_{OC}$  tests, as calculated as following:

$$V_{OC} = \left( \frac{n_{id} K_B T}{q} \right) \ln \left( \frac{I}{I_0} + 1 \right) \quad (6)$$

where  $K_B$  is the Boltzmann constant,  $q$  is the electron charge,  $T$  is the absolute temperature,  $n_{id}$  is the ideal factor,  $I_0$  is the initial light intensity and  $I$  is the light intensity.

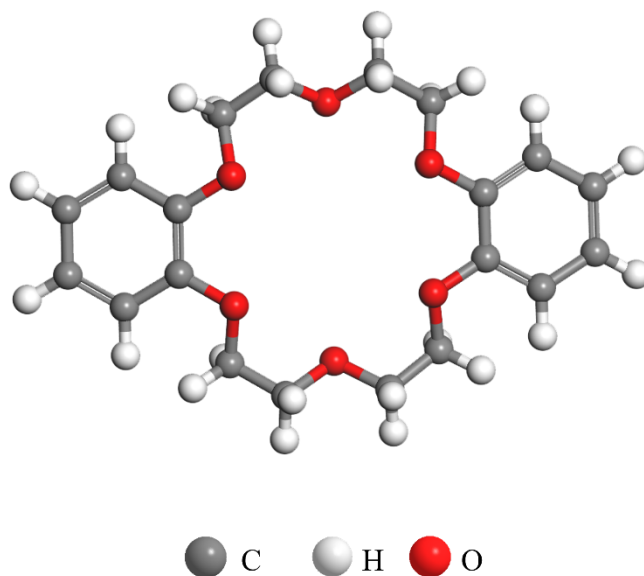

**Fig. S1** Molecular structure diagram of DB18C6.

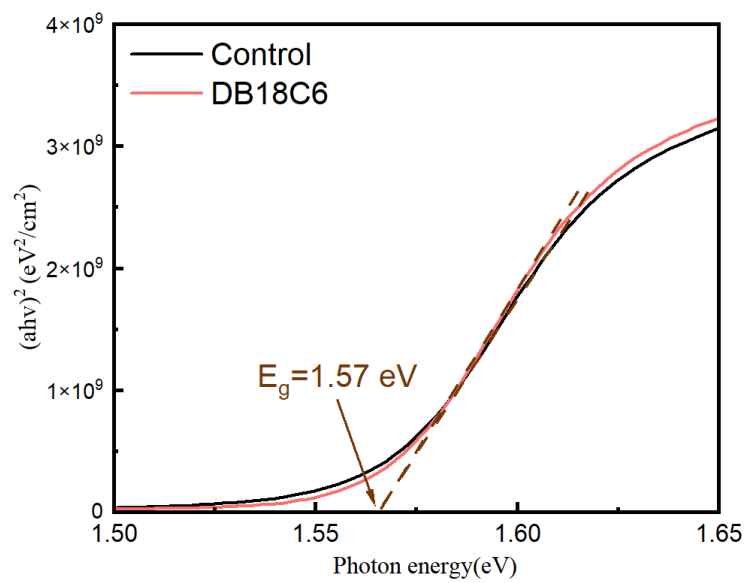

**Fig. S2** Tauc plots of the perovskite film before and after DB18C6-modification.

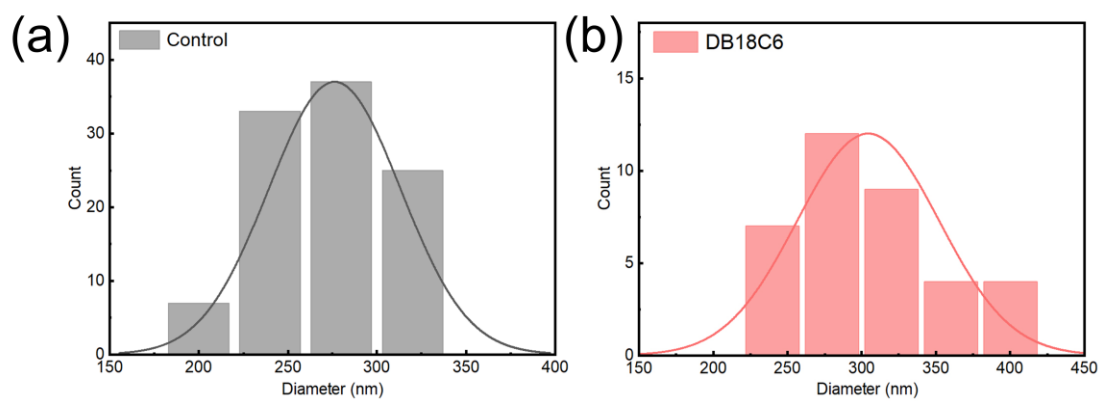

**Fig. S3** The particle size distribution statistics in the top-view SEM images of perovskite films: (a) control; (b) target.

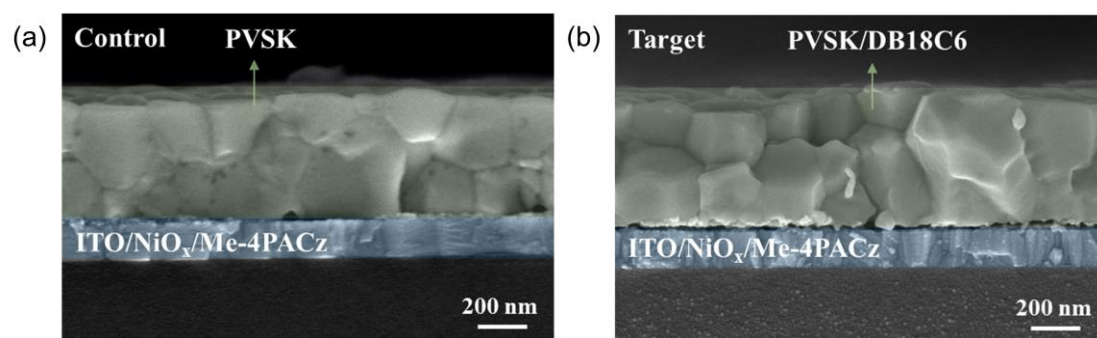

**Fig. S4** The cross-sectional SEM images of perovskite film: (a) control; (b) target.

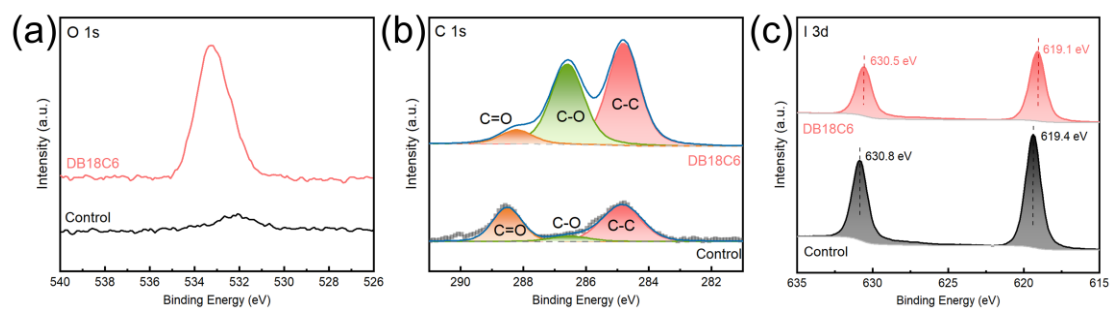

**Fig. S5** XPS spectra of the (a) O 1s, (b) C 1s and (c) I 3d of control and target films.

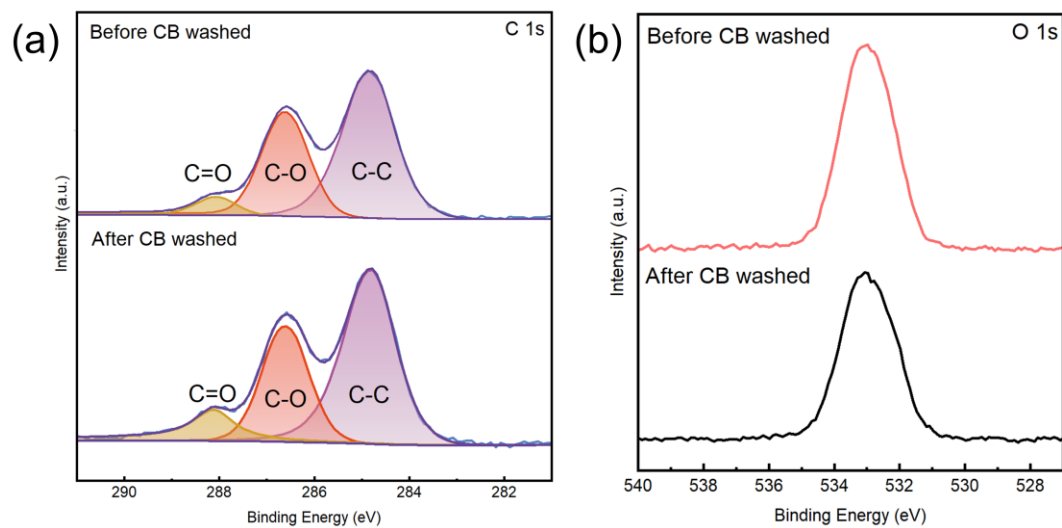

**Fig. S6** XPS spectra of the (a) C 1s and (b) O 1s before and after CB washed.



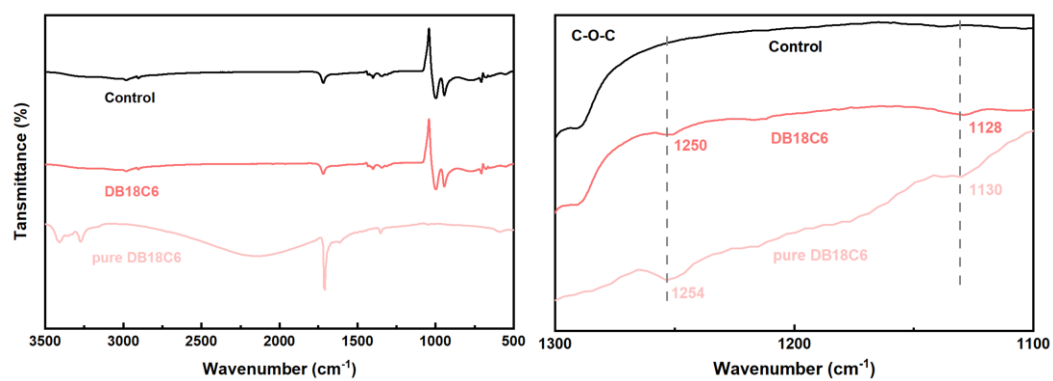

**Fig. S7** FTIR spectra of control, DB18C6-modified and pure DB18C6 samples.

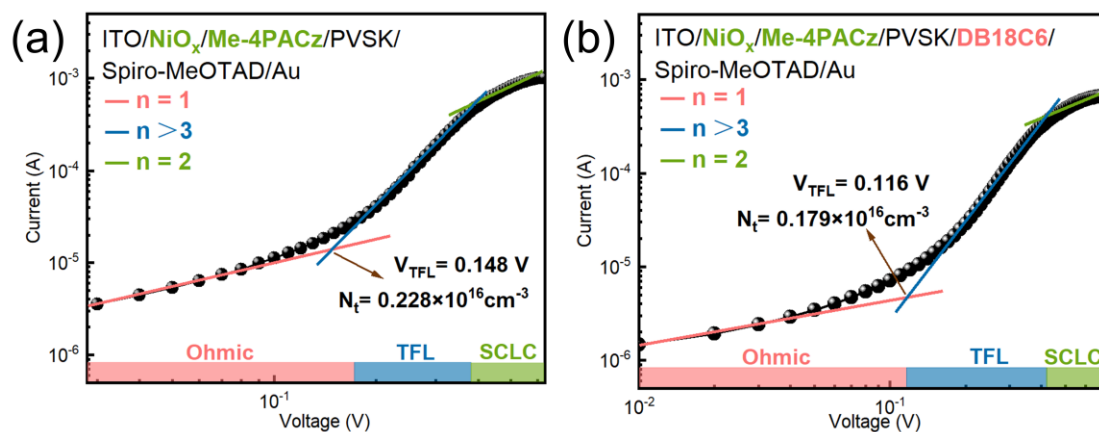

**Fig. S8** The  $I$ - $V$  curves of pure hole transport layer structure devices of (a) control and (b) target.

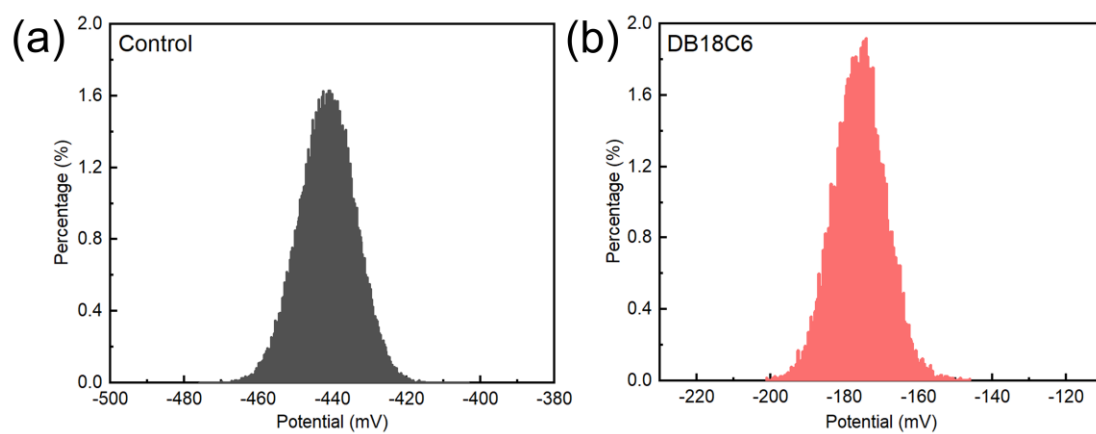

**Fig. S9** The CPD distribution statistics extracted from KPFM of (a) control and (b) target films.

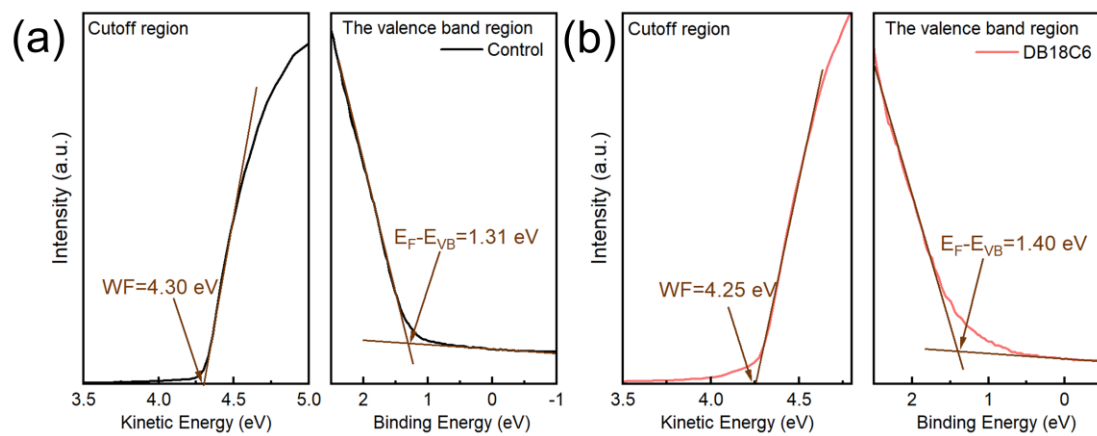

**Fig. S10** UPS of (a) control and (b) target films.

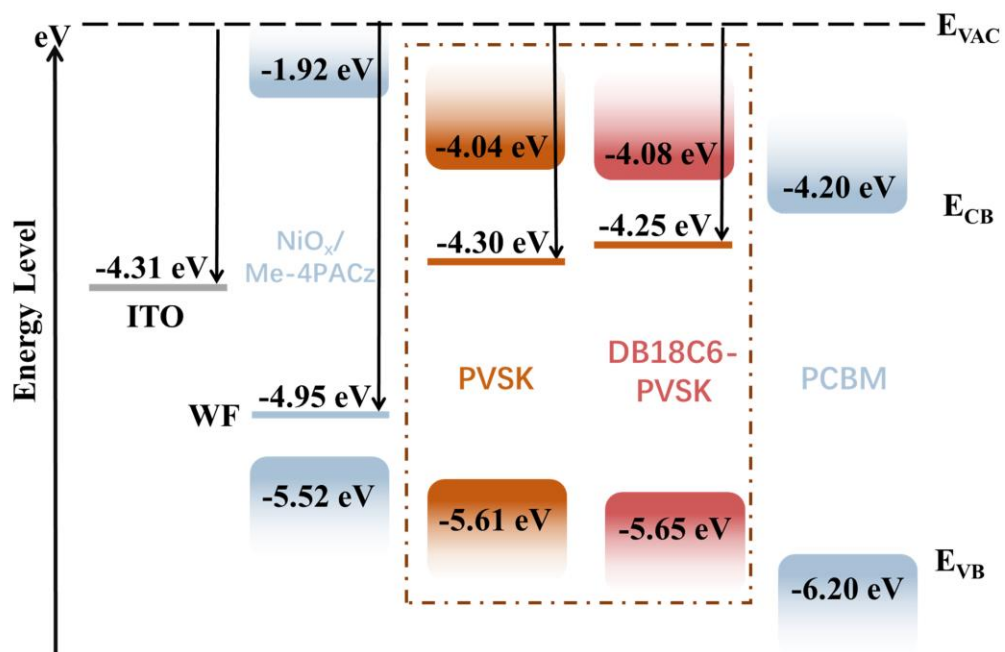

**Fig. S11** The energy level alignment of each layer in inverted PSCs with control and target perovskite absorber.

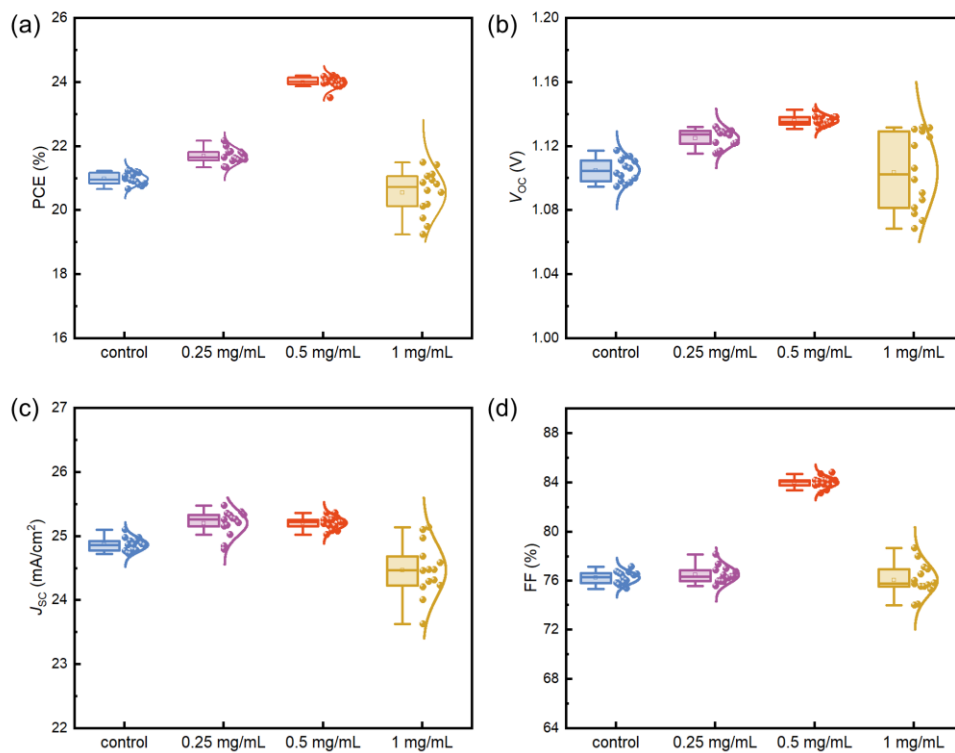

**Fig. S12** Statistical box chart of (a) PCE, (b)  $V_{OC}$ , (c)  $J_{SC}$ , and (d) FF based on DB18C6 modified devices with different concentrations.

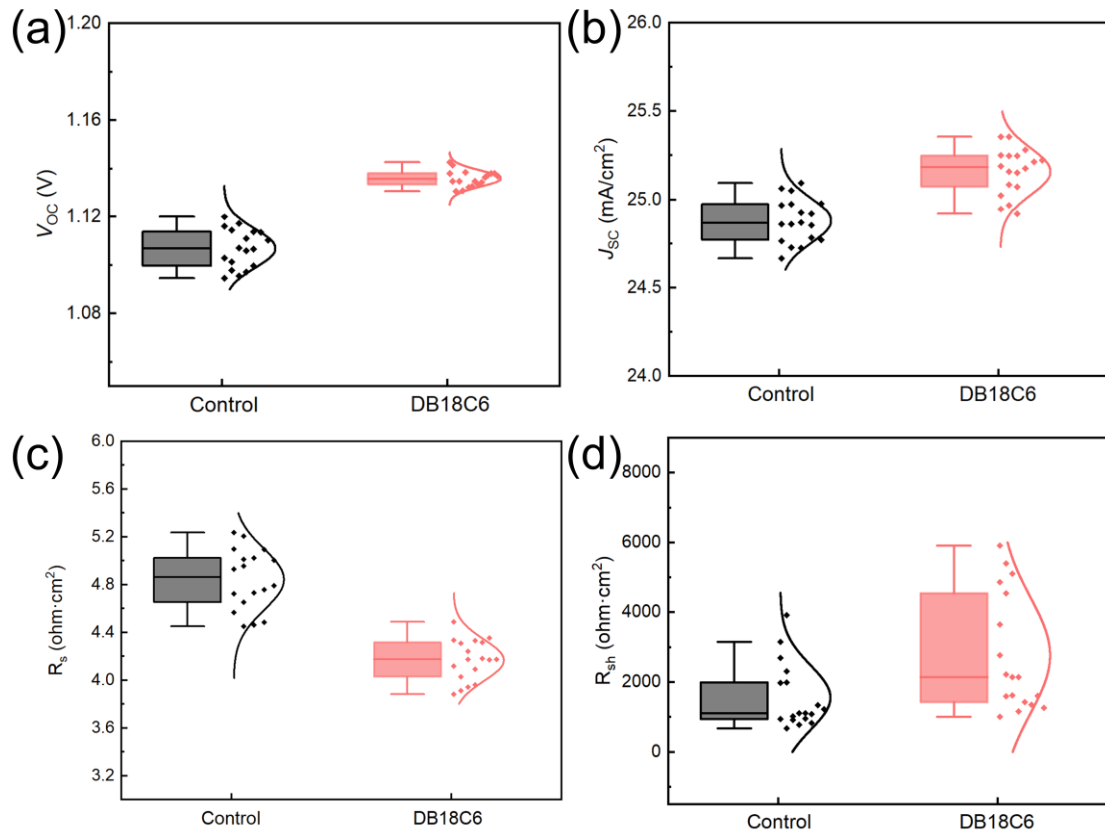

**Fig. S13** Statistical box chart of (a)  $V_{OC}$ , (b)  $J_{SC}$  (c) series resistance ( $R_s$ ) and (d) shunt resistance ( $R_{sh}$ ) of control and target devices.

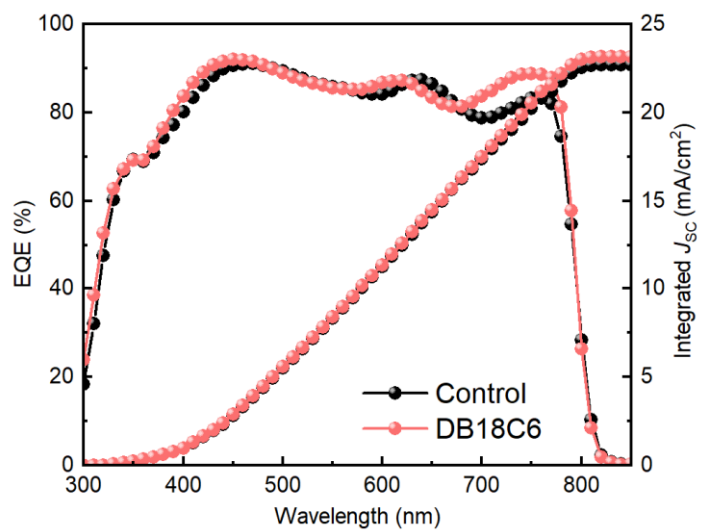

**Fig. S14** EQE spectra of control and target devices.



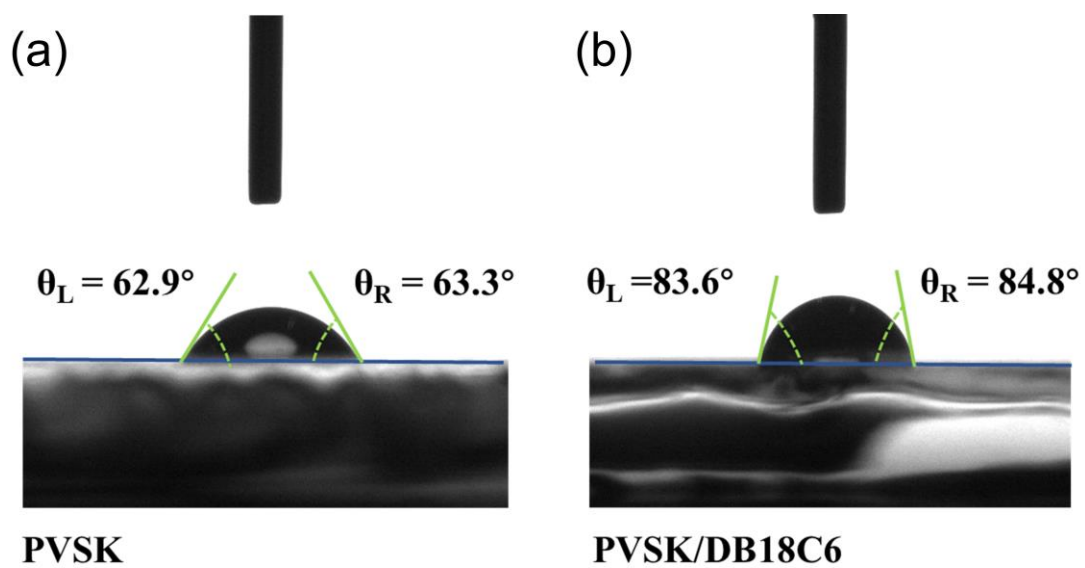

**Fig. S15** Water contact angle of perovskite films: (a) control and (b) target.

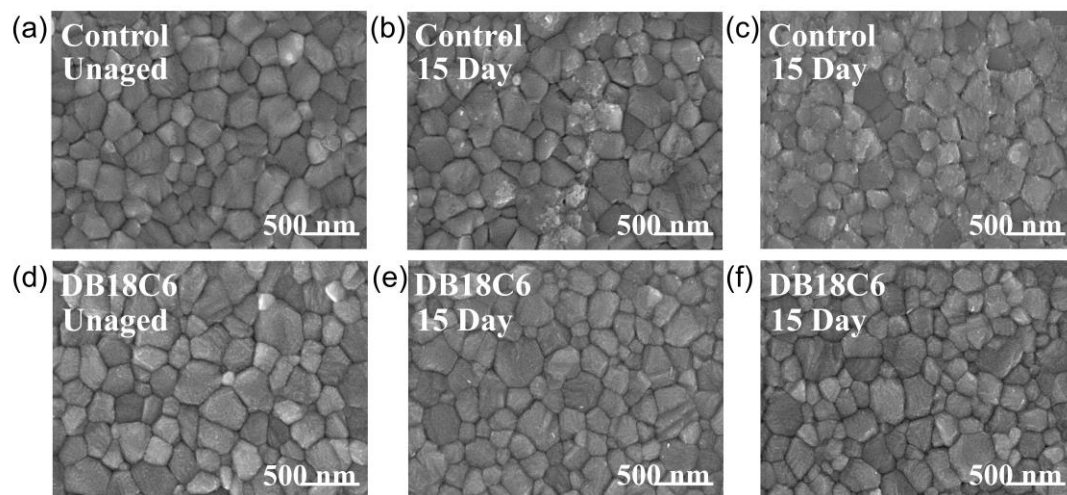

**Fig. S16** Top-view SEM images of perovskite films: (a) unaged control, (b) and (c) aged for 15 days control, (d) unaged target, (d) and (e) aged for 15 days target.

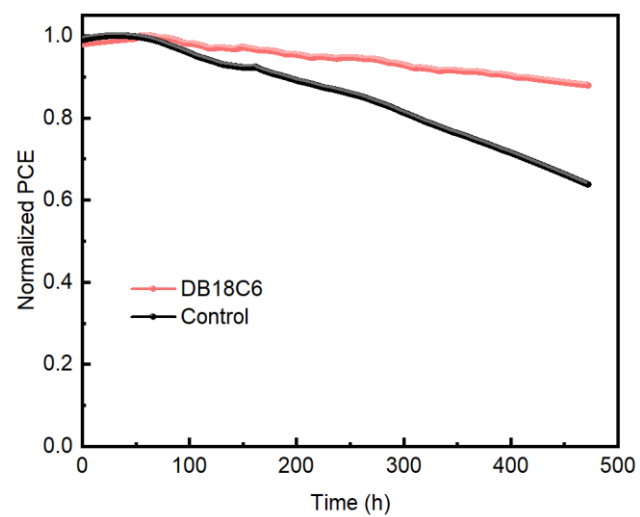

**Fig. S17** The long-term operational stability of control and target devices.

**Table S1** The FWHM of the main diffraction peaks in the XRD pattern of control and target films.

| FWHM (°) | (001) | (011) | (002) | (012) | (022) |
|----------|-------|-------|-------|-------|-------|
| Control  | 0.15  | 0.18  | 0.18  | 0.21  | 0.19  |
| Target   | 0.14  | 0.18  | 0.16  | 0.18  | 0.20  |

**Table S2** TRPL fitting parameters of control and target films

|         | $\tau_1$ (ns) | $A_1$ (%) | $\tau_2$ (ns) | $A_2$ | $\tau_{ave}$ (ns) |
|---------|---------------|-----------|---------------|-------|-------------------|
| Control | 47.39         | 0.65      | 1225.64       | 99.35 | 1225.14           |
| Target  | 25.87         | 0.09      | 1753.72       | 99.91 | 1753.54           |

**Table S3** Photovoltaic parameters of control and target PSCs.

| Device  |              | $V_{oc}$ (V) | $J_{sc}$ (mA/cm <sup>2</sup> ) | FF (%) | PCE (%) | HI   |
|---------|--------------|--------------|--------------------------------|--------|---------|------|
| Control | Reverse scan | 1.12         | 25.05                          | 77.55  | 21.71   | 5.99 |
|         | Forward scan | 1.11         | 24.98                          | 73.60  | 20.41   |      |
| Target  | Reverse scan | 1.14         | 25.25                          | 84.15  | 24.19   | 2.32 |
|         | Forward scan | 1.14         | 25.21                          | 81.90  | 23.63   |      |
